# Supplementary material for: Inflammatory signals from fatty bone marrow support DNMT3A driven clonal hematopoiesis
Source: PubMed Central journal article supplement (PMC10097668; doi:10.1038/s41467-023-36906-1), 2023-04-12
Supplement: 41467_2023_36906_MOESM1_ESM.pdf [file 41467_2023_36906_MOESM1_ESM.pdf]

## Supplementary information

### **Inflammatory signals from fatty bone marrow support *DNMT3a* driven clonal hematopoiesis**

Zioni N<sup>1</sup>, Bercovich A<sup>2</sup>, Chapal-Ilani N<sup>1</sup>, Tal Bacharach<sup>1</sup>, Rappoport N<sup>2,3</sup>, Solomon A<sup>4</sup>, Avraham R<sup>4</sup>, Kopitman E<sup>5</sup>, Porat Z<sup>5</sup>, Sacma M<sup>6</sup>, Hartmut G<sup>6</sup>, Scheller M<sup>7</sup>, Müller-Tidow C<sup>8,9,10</sup>, Lipka D<sup>10</sup>, Shlush E<sup>11</sup>, Minden M<sup>12,13,14,15</sup>, Kaushansky N\*<sup>1</sup>, and Shlush LI.\*<sup>#1,16</sup>

<sup>1</sup>Department of Molecular Cell Biology, Weizmann Institute of Science, Rehovot, Israel; <sup>2</sup>Department of Computer Science and Applied Mathematics, Weizmann Institute of Science, Rehovot, Israel;

<sup>3</sup>Blavatnik School of Computer Science, Tel Aviv University, Tel Aviv, Israel

<sup>4</sup>Department of Biological Regulation, Weizmann Institute of Science, Rehovot, Israel

<sup>5</sup>Life sciences Core Facilities, Weizmann Institute of Science, Rehovot, Israel;

<sup>6</sup>Institute of Molecular Medicine Ulm University, Ulm, Germany;

<sup>7</sup>Department of Medicine, Hematology, Oncology and Rheumatology, University Hospital Heidelberg, Heidelberg, Germany;

<sup>8</sup>Department of Internal Medicine V, Heidelberg University Hospital, Heidelberg, Germany;

<sup>9</sup>European Molecular Biology Laboratory (EMBL), Heidelberg, Germany;

<sup>10</sup>German Cancer Consortium (DKTK) and German Cancer Research Center (DKFZ), Partner Site Heidelberg, Heidelberg, Germany;

<sup>11</sup>Ivf unit, Galilee Medical Center, Nahariya, Israel;

<sup>12</sup>Princess Margaret Cancer Centre, University Health Network (UHN), Toronto, ON Canada;

<sup>13</sup>Department of Medical Biophysics, University of Toronto, Toronto, ON Canada;

<sup>14</sup>Department of Medicine, University of Toronto, Toronto, ON Canada;

<sup>15</sup>Division of Medical Oncology and Hematology, University Health Network, Toronto, ON Canada and Hematology, University Health Network, Toronto, ON Canada;

<sup>16</sup>Hematology and Bone Marrow Transplantation Institute Rambam Healthcare campus Haifa Israel;

# To whom correspondence should be addressed.

\*These authors contributed equally

Content: Supplementary figures 1-15  
Supplementary Tables 1-4

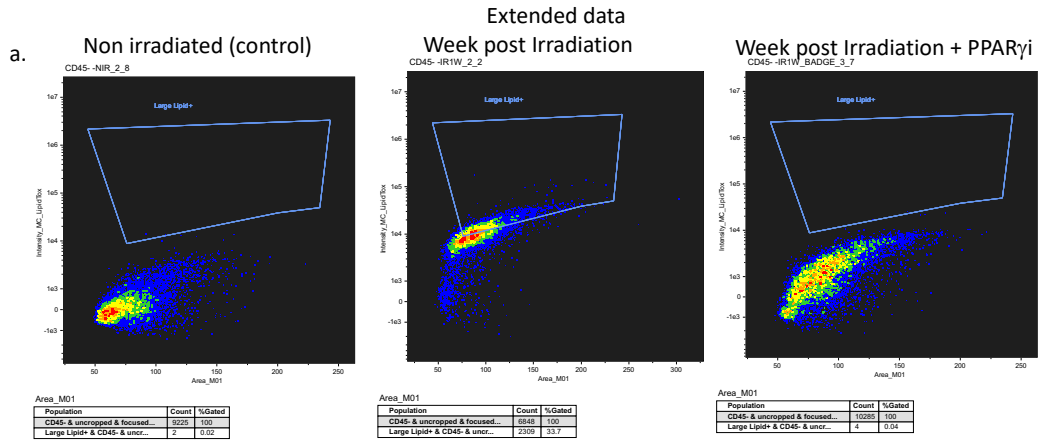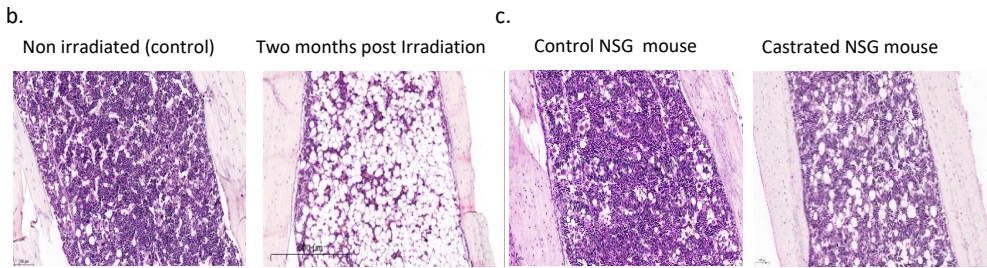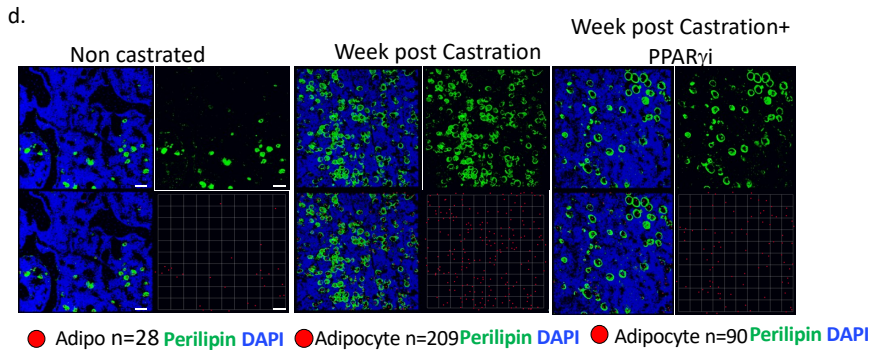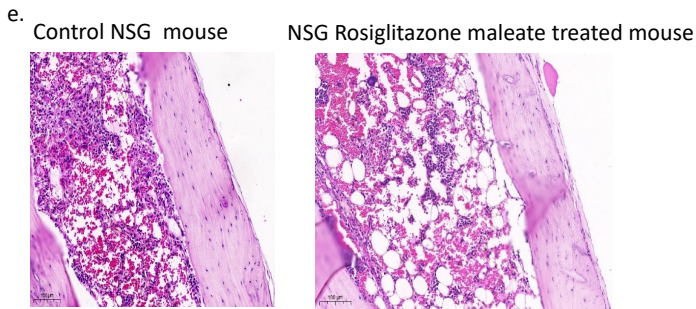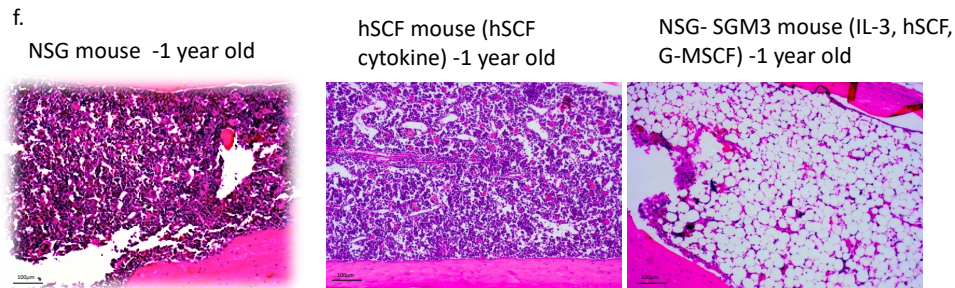

**Supplementary Fig 1: FBM establishment in NSG mice.** **a.** Image stream analysis of NSG NBM, FBM and FBM + PPAR $\gamma$  mice tibia/femur. CD45 negative cells were stained with LipidTOX™ and DAPI and quantified by image stream. **b.** H&E staining of BM tibia derived from non-irradiated control normal bone marrow (NBM) (n=5) scale bar: 100 $\mu$ M, and BM derived from two months old NSG mice following irradiation (n=5) scale bar: 500 $\mu$ M. **c.** H&E staining of BM tibia derived from NSG castrated (CAS) mouse month following castration. scale bar: 100 $\mu$ M **d.** Representative 3D whole-mount immunofluorescence staining of epiphyseal-metaphyseal BM long bones derived from Castrated NSG mice and castrated mice treated with PPAR $\gamma$ . Adipocytes are depicted by Perilipin expression and by distinctive unilocular morphology in the DIC (differential interference contrast) channel. DAPI in blue. Adipocytes are additionally marked by red dots. 1 unit Scale Bar: 70.99 $\mu$ m; n=12-14 708 $\mu$ m x 708 $\mu$ m x 30-50 $\mu$ m stacked images from 3 mice and 2 bones (femur, tibia) each group. **e.** H&E staining of BM tibia derived from NSG mouse that were treated orally with PPAR- $\gamma$  activator (rosiglitazone maleate) (20 mg/kg/day) for three weeks (n=3). scale bar: 100 $\mu$ M **f.** H&E staining of BM tibia derived from one-year-old NSG (n=3), NSG-hSCF (NSG mice that express human membrane-bound stem cell factor) (n=3) or NSG-SGM3 mice (expressing human IL3, GM-CSF (CSF2) and SCF (KITLG)) (n=3). Shown are the H&E staining of tibial of one experiment out of five independent experiments. scale bar: 100 $\mu$ M

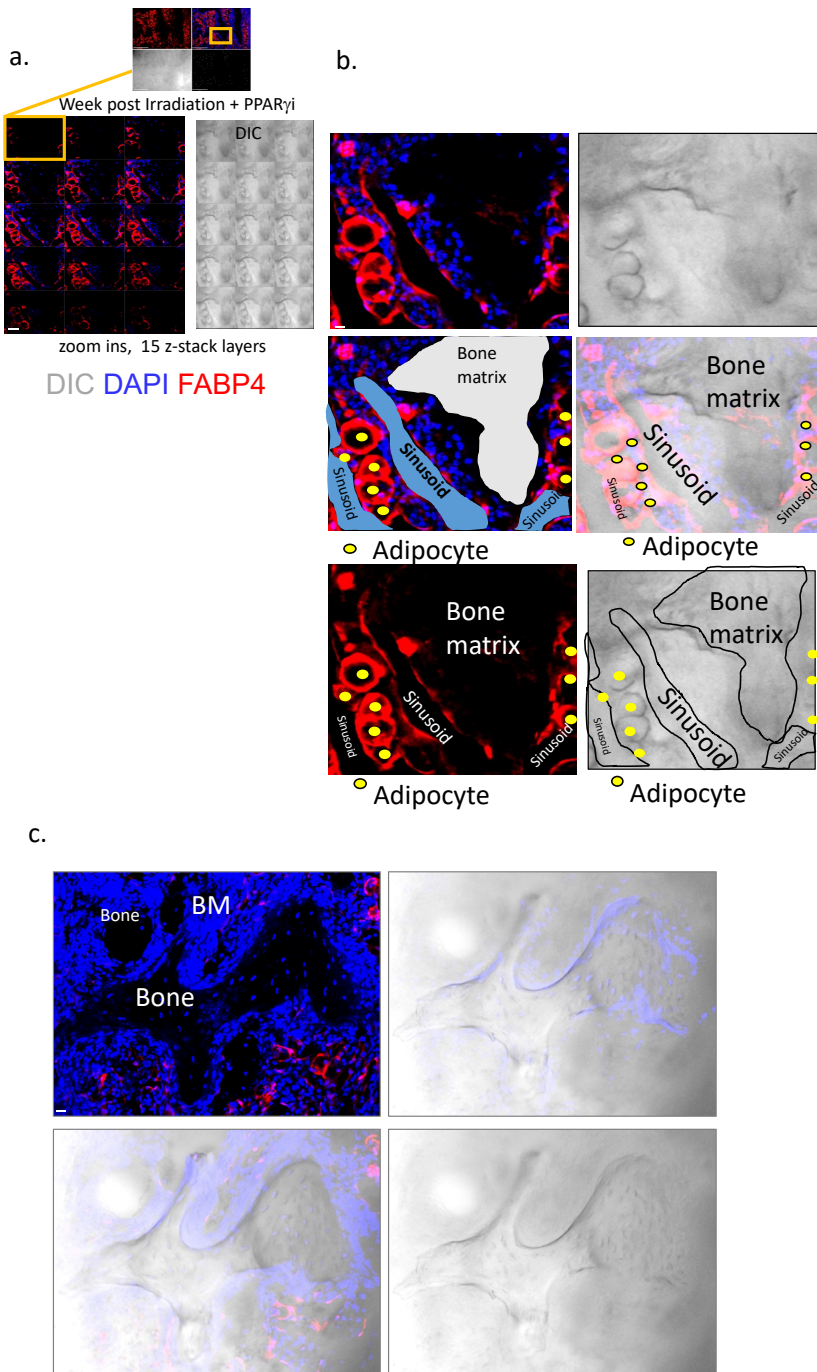

**Supplementary Fig 2: Z-stacked confocal images from whole-mounts of bisected NSG mouse bones from fig. 1f.** a. Structure and cellular integrity of Epiphyseal/metaphyseal BM regions. b. Detection of typical unilocular morphology of adipocytes was used by DIC (differential interference contrast) channel and also other structures. c. Use of protective whole-mounts, prevent collapsing of sinusoidal vessels, the “empty” spaces here are trabecular bone structures. Data shown is representative of three independent experiments. scale bar: 100 $\mu$ M

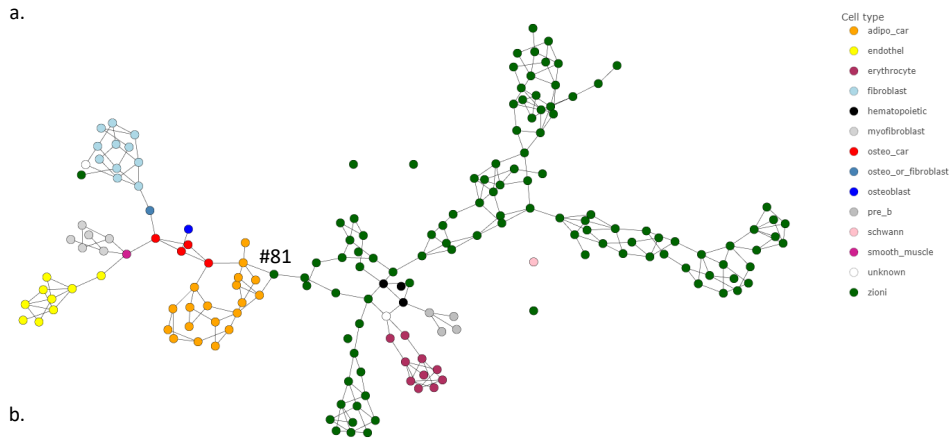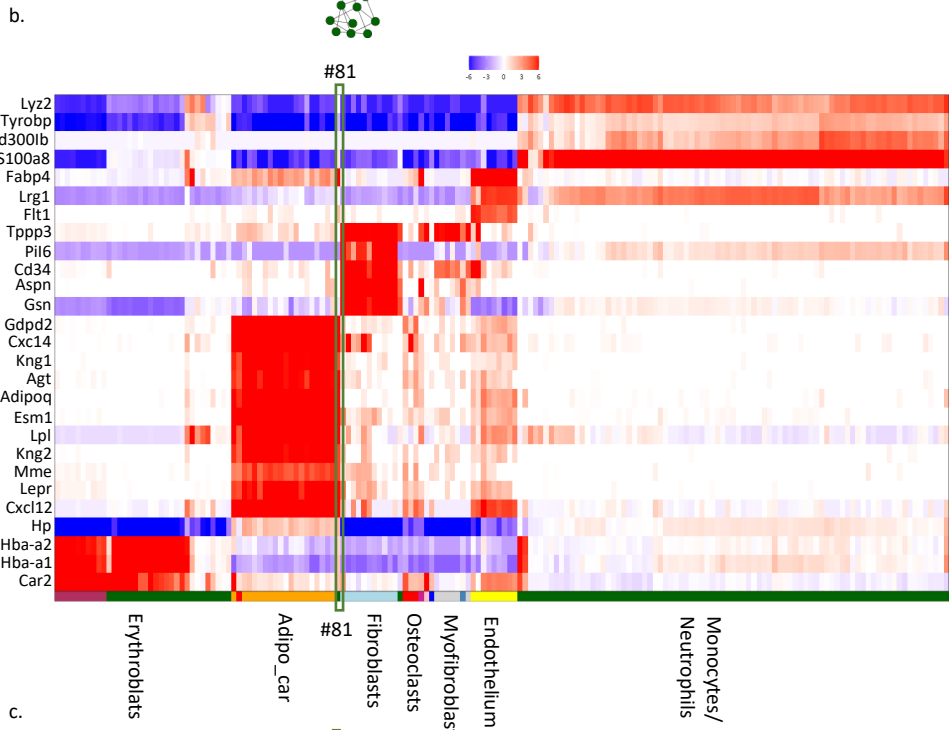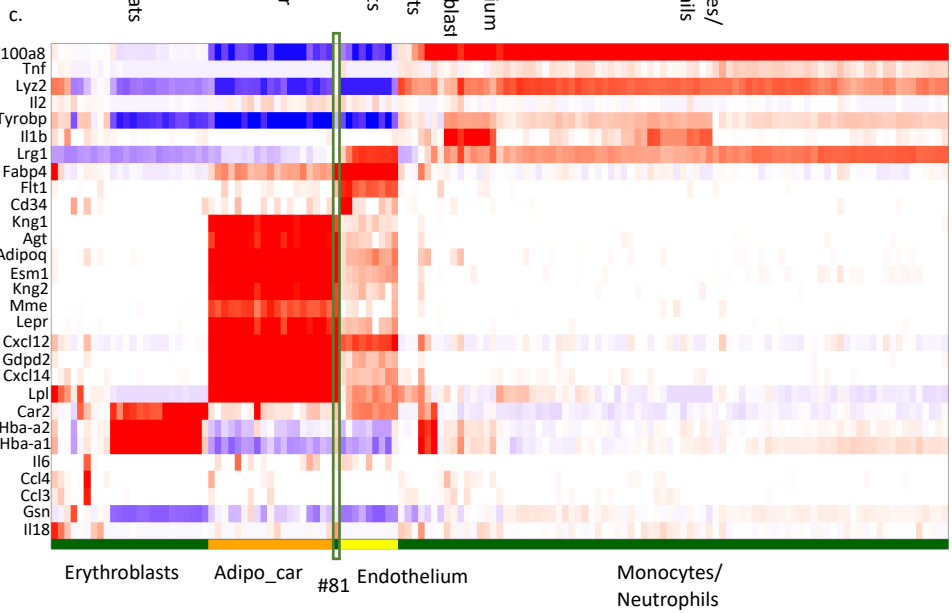

**Supplementary Fig. 3: single nuclei RNA sequencing on BM derived cells.** **a.** BM cells were enriched for adipocytes from both irradiated mice (FBM n=4058 single nuclei) (n=3) and the BADGE control mice (n=3428 single nuclei) (n=3). Single nuclei were isolated and analyzed by 10X genomics. The Metacell platform<sup>1,2</sup> was used to produce the UMAP which was also integrated with single cell RNAseq data from Baccin et.al<sup>3</sup>. Cell type annotations were performed by the same genes as in Baccin et.al. Cells were divided into 181 Metacells. Metacell #81 (circled) was enriched in cells from our cohort (Zioni dark green) and was clustered together with cells designated as Cxcl12-abundant-reticular (CAR) Adipocytes (Adipo\_car orange). The UMAP and other features of the integrated model can be observed in the following link: ([https://tanaylab.weizmann.ac.il/MCV/FBM/Single\\_nuclei\\_for\\_adipocytes/](https://tanaylab.weizmann.ac.il/MCV/FBM/Single_nuclei_for_adipocytes/)). **b.** A heatmap of key gene markers defining mouse mesenchymal cells of the integrated data by Baccin et.al. (Erythroblasts-purple; Adipo-CAR-orange; Fibroblasts-light blue; Endothelium-yellow; Myofibroblasts-grey; Osteoblats-red) and cells of the current cohort (Zioni in dark green). Most of the Zioni et.al cells were assigned to a neutrophil/monocyte cells, while few were similar to erythroblasts. One Metacells#81 was clustered together with Adipo-car cells. **c.** A heatmap of key gene markers defining mouse mesenchymal cells of the integrated data by Baccin et.al. (Adipo-CAR-orange; Endothelium-yellow;) and cells of the current cohort (Zioni in dark green), which we assigned to either Erythroblasts or monocyte/neutrophil based on gene expression.

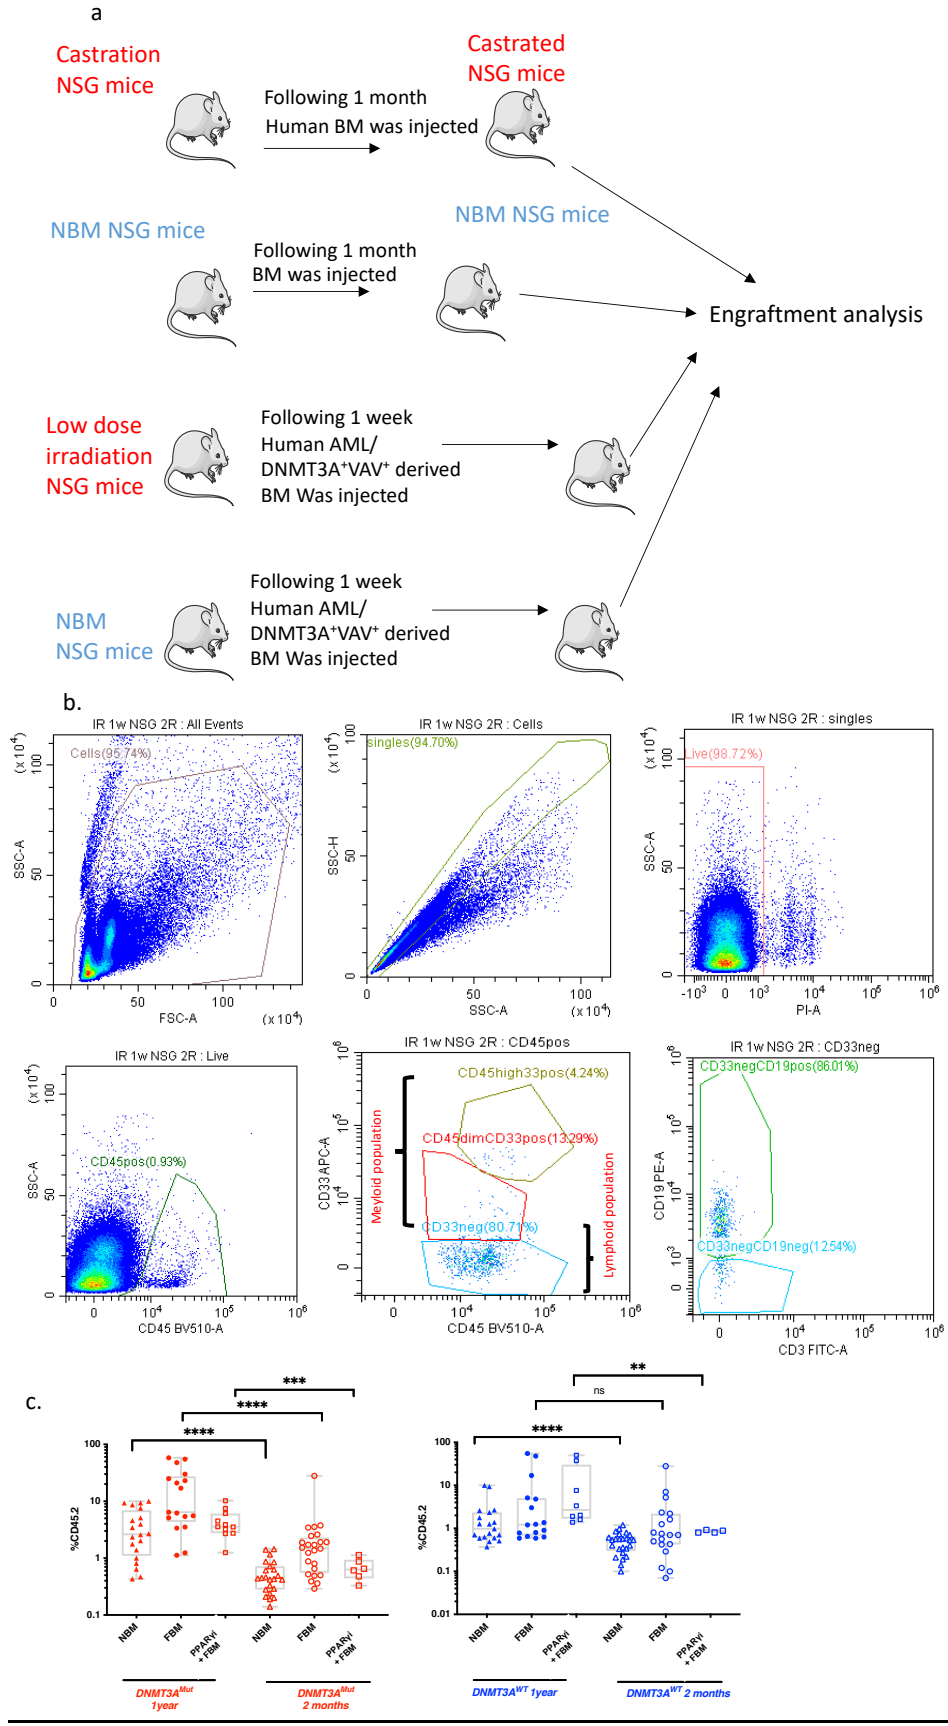



**Fig. 4: a. Schematic presentation of different models used in this study. b. Multilineage engraftment of AML patient-derived.** FACs analysis CD3 depleted  $1 \times 10^6$  AML primary human cells (sample #160005) (50% *hDNMT3A*<sup>R882H</sup>, 50% *NPM1c*). Eight weeks later mice were sacrificed, and BM was flushed from tibias and femurs. A multi-lineage engraftment is defined when a subpopulation of B cell progenitors (CD33-CD3- cells expressing CD19+) can be identified. **c.** *DNMT3A*<sup>Mut</sup> cells derived from one-year-old mice injected into FBM had the most significant growth advantage with a tenfold increase in comparison to NBM and PPAR $\gamma$ i controls. Data presented as box and whiskers min to max. All comparisons were performed using a two-tailed, non-paired, nonparametric Mann-Whitney test compare ranks. \*\*\* $p < 0.005$ , \*\*\*\* $p < 0.0005$ , \*\*\*\*\* $p < 0.00005$ , n.s – not significant. *DNMT3A*<sup>Mut</sup> 1year vs. *DNMT3A*<sup>Mut</sup> 2months: NBM vs. NBM  $p < 0.00001$ , FBM vs. FBM  $p = 0.00001$ , FBM+ PPAR $\gamma$ i vs. FBM+ PPAR $\gamma$ i  $p = 0.0002$ . *DNMT3A*<sup>WT</sup> 1year vs. *DNMT3A*<sup>WT</sup> 2months: NBM vs. NBM  $p < 0.00001$ , NBM vs. NBM  $p = \text{n.s.}$ , FBM+ PPAR $\gamma$ i vs. FBM+ PPAR $\gamma$ i  $p = 0.004$ . *DNMT3A*<sup>Mut</sup> 1 year: NBM (n=20), FBM (n=17), FBM+ PPAR $\gamma$ i (n=11). *DNMT3A*<sup>Mut</sup> 2 months: NBM (n=23), FBM (n=24), FBM+ PPAR $\gamma$ i (n=6). *DNMT3A*<sup>WT</sup> 1 year: NBM (n=13), FBM (n=12), FBM+ PPAR $\gamma$ i (n=8). *DNMT3A*<sup>WT</sup> 2 months: NBM (n=24), FBM (n=17), FBM+ PPAR $\gamma$ i (n=4). Source data are provided as a Source Data file. Mice image was Created with <https://smart.servier.com>. Mice figures were drawn by using pictures from Servier Medical Art. Servier Medical Art by Servier is licensed under a Creative Commons Attribution 3.0 Unported License (<https://creativecommons.org/licenses/by/3.0/>).



2 month old mice

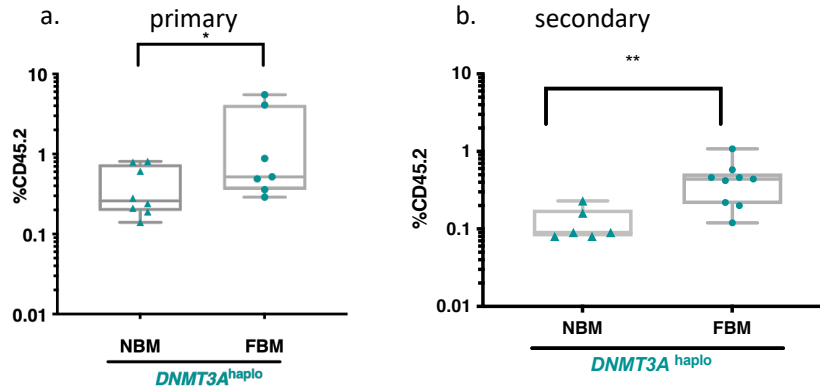

One year old mice

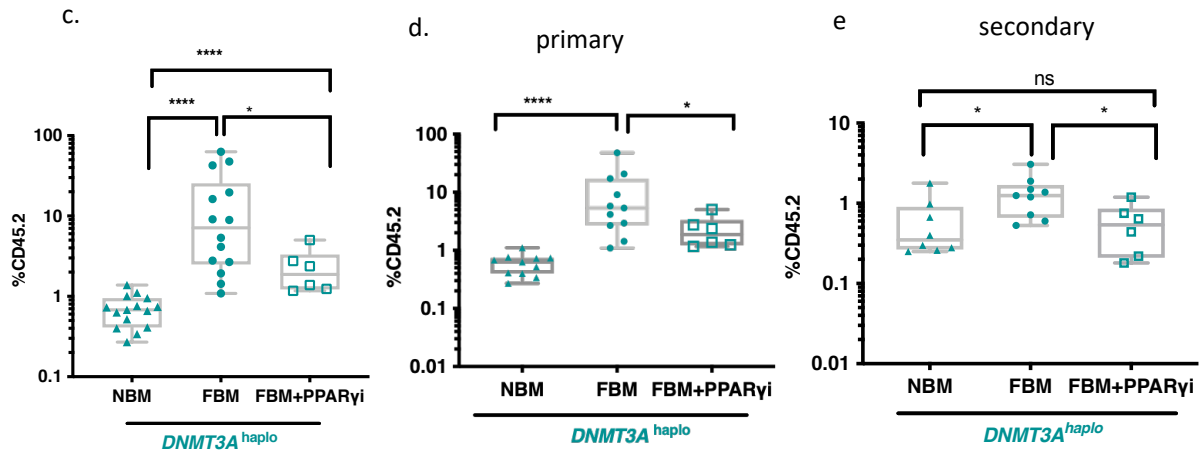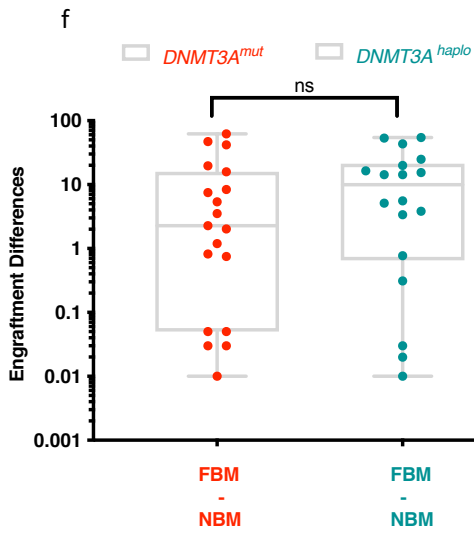

**Supplementary Fig. 5: Engraftment of *DNMT3A*<sup>haplo</sup> derived BM cells in FBM NSG mice.** **a.** FACs analysis of young-two-month-old  $6 \times 10^6$  *DNMT3A*<sup>haplo</sup> (CD45.2) BM derived cells transplanted to normal bone marrow (NBM) (n=8) and fatty bone marrow (FBM) (NSG mice are CD45.1) (n=7). Eight weeks cells following transplantation, BM was flushed from tibia/femur and expression of mCD45.2 was measured by FACs. Engraftment was assessed according to presence of  $\geq 0.1\%$  mCD45.2 cells. **b.** Self-renewal of *DNMT3A*<sup>haplo</sup> derived BM cells in FBM NSG mice. Primary transplantation of *DNMT3A*<sup>haplo</sup> was performed as detailed in a. Then, a secondary transplantation was performed to FBM NSG mice (n=6, n=7 respectively). NBM vs. FBM p=0.0047. **c.** FACs analysis of one-year-old *DNMT3A*<sup>haplo</sup>,  $6 \times 10^6$  BM derived cells transplanted to control (n=15), to a week following Irradiation (n=14) and to Irradiated NSG mice (CD45.1) treated with PPAR $\gamma$  (n=6) performed as detailed in a. NBM vs. FBM p<0.00001, FBM vs. FBM+ PPAR $\gamma$  p= 0.0326. NBM vs. FBM+ PPAR $\gamma$  p<0.00001. **d.** Primary transplantation of one-year *DNMT3A*<sup>haplo</sup> BM derived cells to NBM mice (n=11), and to FBM mice (n=11) and to Irradiated NSG mice treated with PPAR $\gamma$  (FBM+ PPAR $\gamma$ ) (n=6). NBM vs. FBM p<0.00001, FBM vs. FBM+ PPAR $\gamma$  p=0.0477 **e.** Secondary transplantation of cells from d. to FBM NSG mice (n=8, n=9, n=6 respectively). NBM vs. FBM p=0.0206, FBM vs. FBM+ PPAR $\gamma$  p=0.0128. **f.** Differences (FBM-NBM) between engraftment of middle-aged *DNMT3A*<sup>Mut</sup> and *DNMT3A*<sup>haplo</sup> BM derived cells when transplanted to FBM. Each dot represents a mouse. (*DNMT3A*<sup>Mut</sup> n=19, *DNMT3A*<sup>haplo</sup> n=18). Data in this figure presented as box and whiskers min to max . All comparisons were performed using a two-tailed, non-paired, nonparametric Mann-Whitney test compare ranks. \*\*\*p<0.005, \*\*\*\*p<0.0005, \*\*\*\*\*p<0.00005, n.s – not significant Source data are provided as a Source Data file.

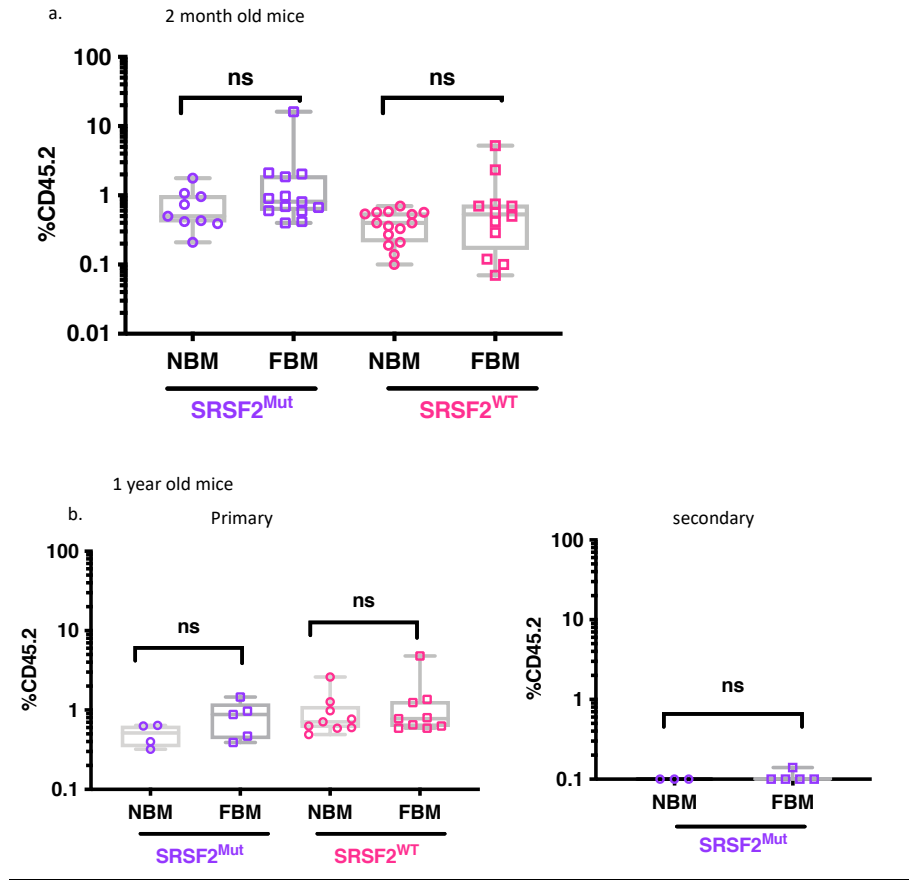

**Supplementary Fig. 6: Engraftment analysis of *SRSF2*<sup>Mut</sup> or control *SRSF2*<sup>WT</sup> BM derived cells in FBM. a.** FACs analysis of young-two-month-old  $6 \times 10^6$  *SRSF2*<sup>Mut</sup> (purple) or control *SRSF2*<sup>WT</sup> (pink) (CD45.2) BM derived cells transplanted to normal bone marrow mice (NBM) (*SRSF2*<sup>WT</sup> to n=15 NSG mice, *SRSF2*<sup>Mut</sup> to n=9 NSG mice) and to fatty bone marrow (FBM) NSG mice (CD45.1) (*SRSF2*<sup>WT</sup> to n=12 NSG mice, *SRSF2*<sup>Mut</sup> to n=13 NSG mice). Eight weeks following transplantation, BM was flushed from tibia/femur and expression of mCD45.2 was measured by FACs. Engraftment was assessed according to presence of  $\geq 0.1\%$  mCD45.2 cells. **b.** Primary transplantation of middle-aged *SRSF2*<sup>Mut</sup> (purple) (NBM, n= 4; FBM, n=5) or control *SRSF2*<sup>WT</sup> (pink) (NBM, n=9; FBM, n=9) was performed as detailed in a. Then, a secondary transplantation of middle-aged *SRSF2*<sup>Mut</sup> (purple) BM derived cells was performed to FBM NSG mice (n=3, n=5 respectively). Data in this figure presented as box and whiskers min to max. n.s – not significant. All comparisons were performed using a two-tailed, non-paired, nonparametric Mann-Whitney test compare ranks. Source data are provided as a Source Data file.

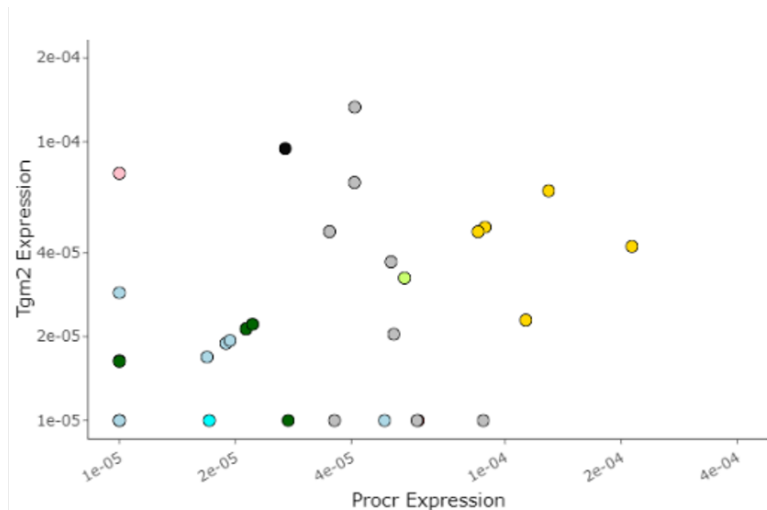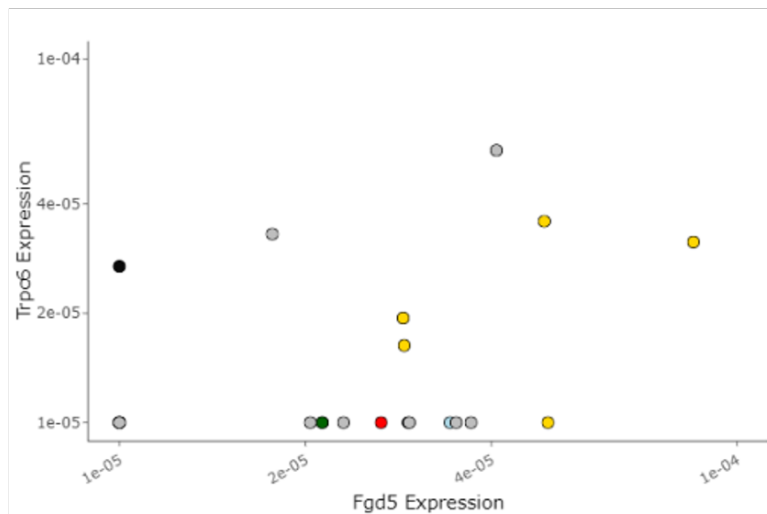

**Supplementary Fig. 7: Single cell RNA-seq analysis and cell type designation**

Cells from *DNMT3A<sup>mut</sup>* and *DNMT3A<sup>WT</sup>* were injected to mice with fatty bone marrow (FBM) and normal bone marrow (NBM). Three days after injection lin-+KIT+ (LK) cells were isolated from mice bone marrow (BM) and underwent single cell RNA-Seq analysis. MetaCell algorithm was used to assign different single cells to Metacells with unique gene programs and cell types 38. Gold, hematopoietic stem cells (HSCs); darkgreen, common myeloid progenitors (CMP); lightblue, common lymphoid progenitors, (CLP); cyan, dendritic progenitors (DcP); grey, multipotent progenitors (MPP); darkolivegreen, monocyte progenitors (MonoP); pink, megakaryocyte progenitors (MegK); red, erythroid progenitors (EryP); grey4 (Unknown). Conditions: normal bone marrow (NBM); wild type (wt); fatty bone marrow (FBM); naïve cells- are cells extracted directly from BM of respective mice without transplantation. cre is the cre control. Each single cell was designated to a Metacell and each Metacell got its cell type designation based on the expression of the main lineage defining HSCs genes. Source data are provided as a Source Data file.

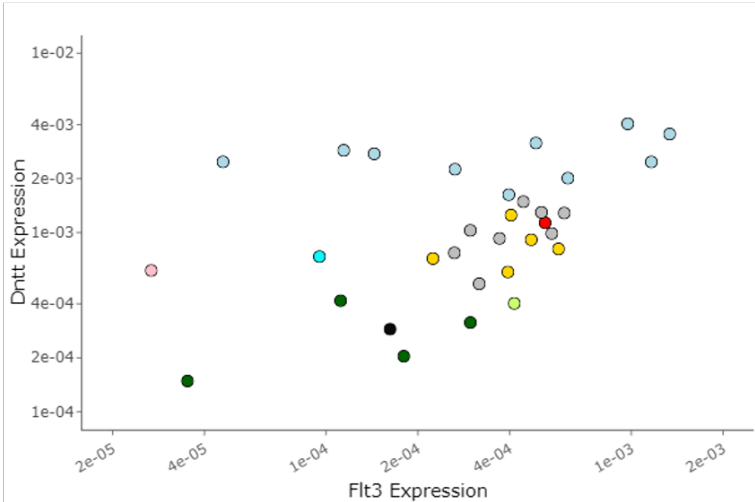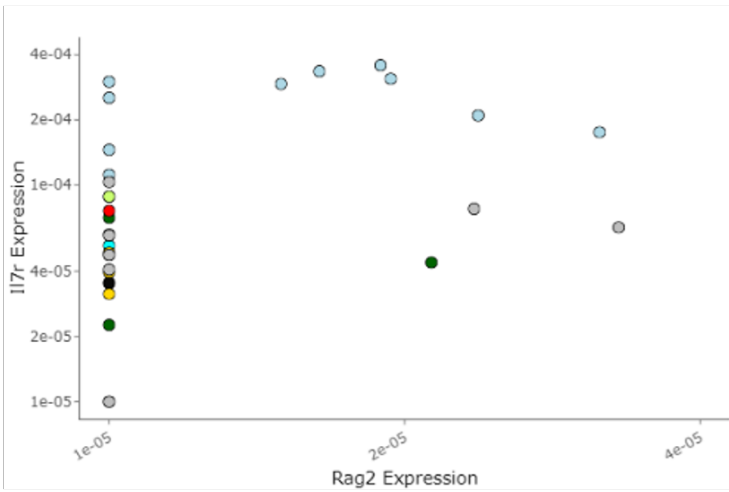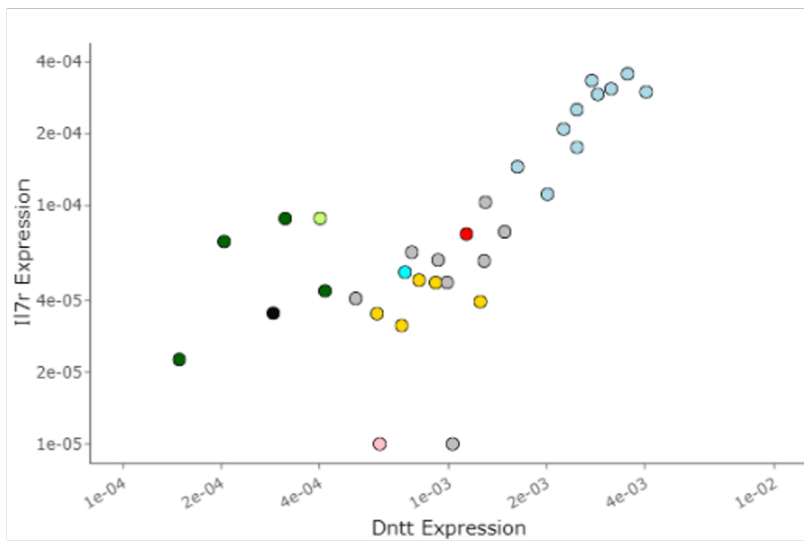

**Supplementary Fig. 8 Single cell RNA-seq analysis and cell type designation.** As was described in Supplementary Fig 7. Here, each single cell was designated to a Metacell and each Metacell got its cell type designation based on the expression of the main lineage defining CLPs genes. Source data are provided as a Source Data file

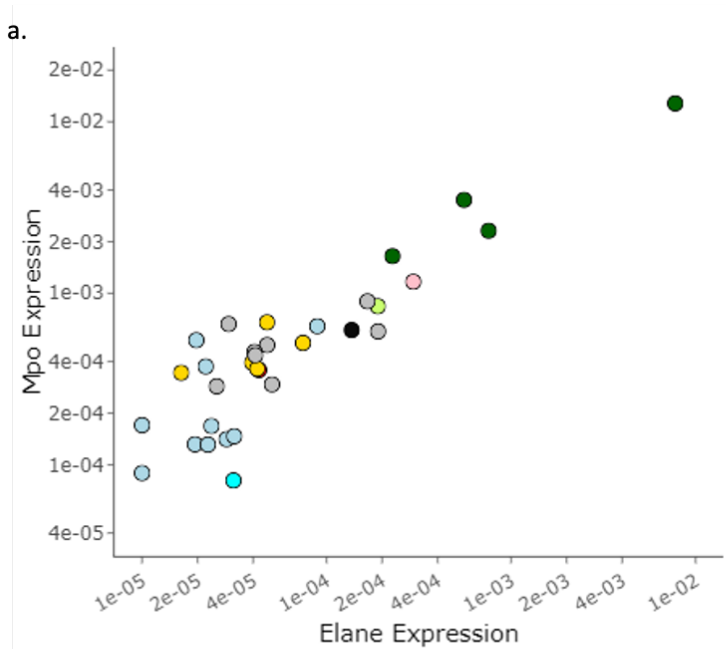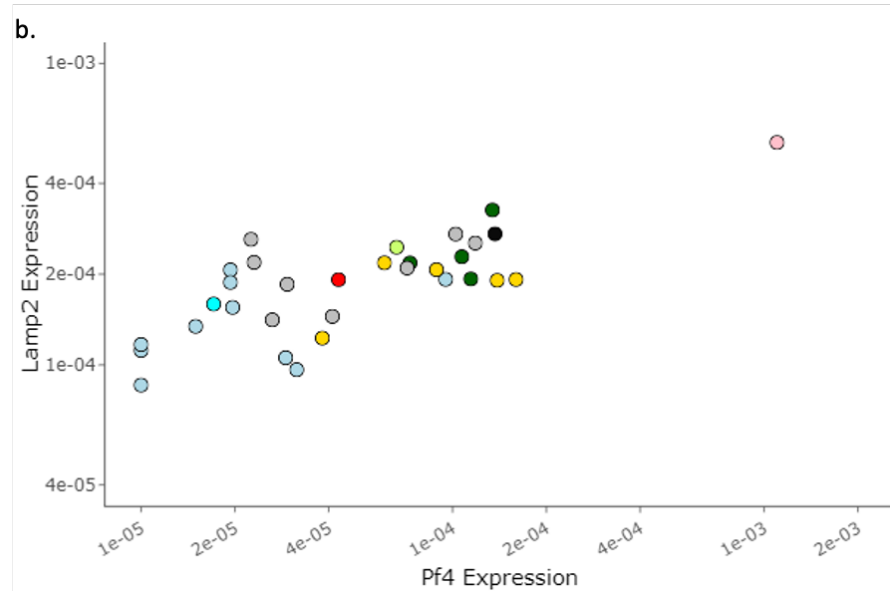

**Supplementary Fig. 9 Single cell RNA-seq analysis and cell type designation.** As was described in Supplementary Fig 7. Here, each single cell was designated to a Metacell and each Metacell got its cell type designation based on the expression of the main lineage defining CMP genes (a) and MegK (b). Source data are provided as a Source Data file

a.

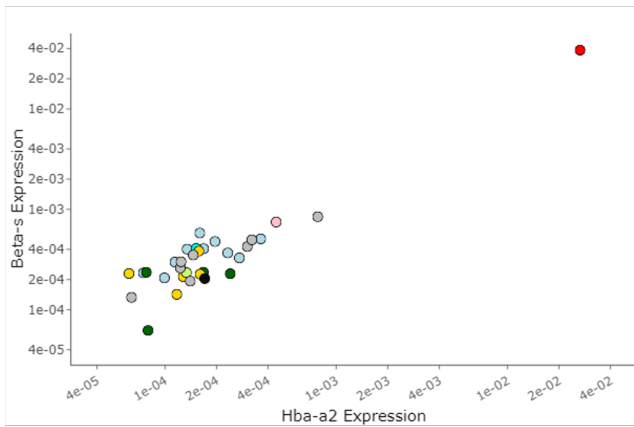

b.

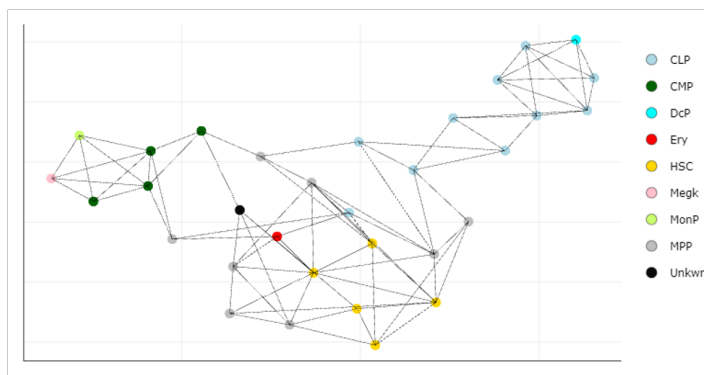

**Supplementary Fig. 10: Single cell RNA-seq analysis and cell type designation.** As was described in Supplementary Fig 7. Here, each single cell was designated to a Metacell and each Metacell got its cell type designation based on the expression of the main lineage defining Ery genes (a) and The Metacell model of the sc-RNA-seq data Supplementary (b). Source data are provided as a Source Data file.



a.

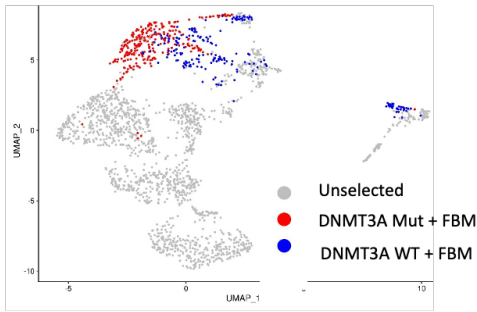

b.

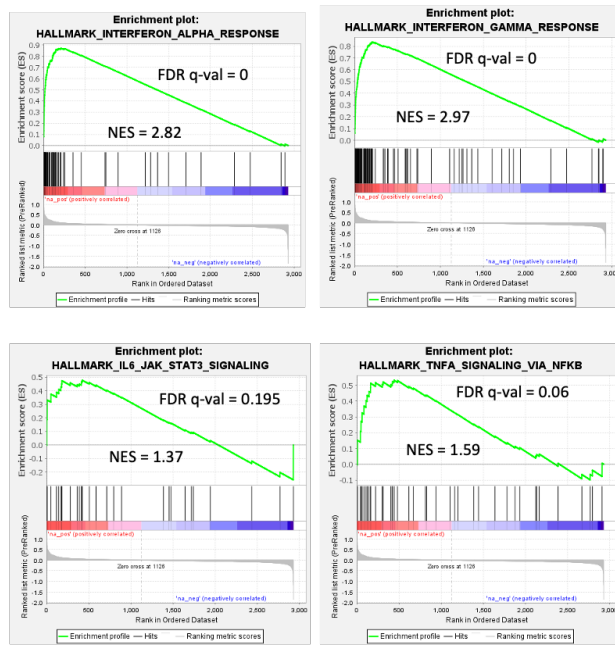

**Supplementary Fig. 11: Ranked GSEA analysis of differentially expressed genes between the cluster containing the *DNMT3A*<sup>Mut</sup> cells exposed to FBM and all other cells.**

a. The UMAP clustering of the single cell RNA sequencing data exposed the clustering of *DNMT3A*<sup>Mut</sup> cells exposed to FBM (red cells) almost exclusively to a single cluster (cluster #1 in Supplementary Table 2). *DNMT3A*<sup>wt</sup> cells exposed to FBM (blue) were separated from the *DNMT3A*<sup>Mut</sup> cells. All other cells which include Mut and Wt cells on normal bone marrow (NBM); naïve cells- are cells extracted directly from BM of respective mice without transplantation and cre control are included in the Unselected group and are marked in grey. b. Ranked GSEA analysis on differentially expressed genes between *DNMT3A*<sup>Mut</sup> cells exposed to FBM cluster and other clusters exposed significant enrichment of inflammatory pathways. For each pathway a normalized enrichment score (NES) and false discovery rate (FDR) q value are presented. Source data are provided as a Source Data file.

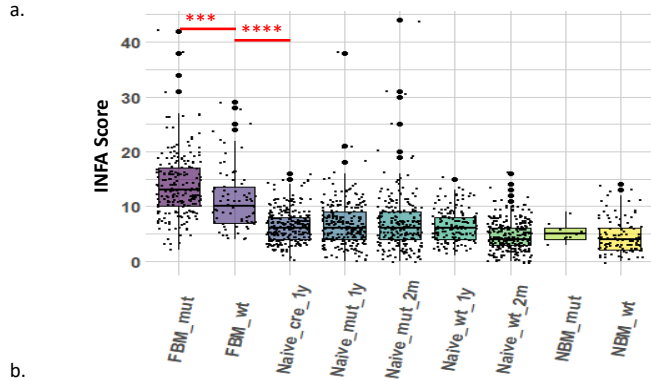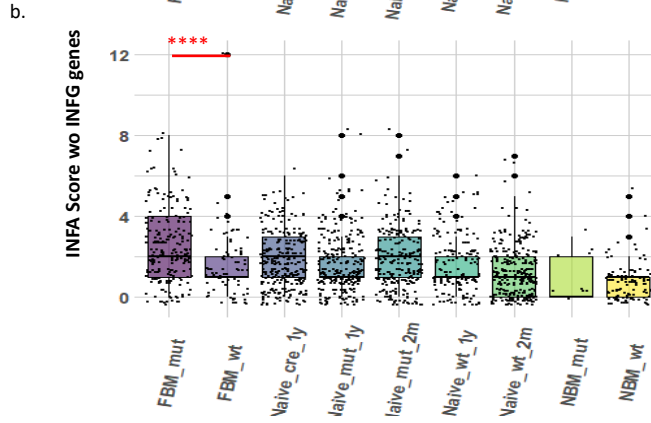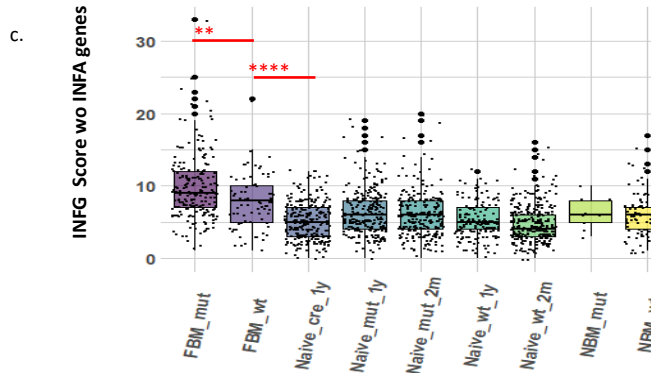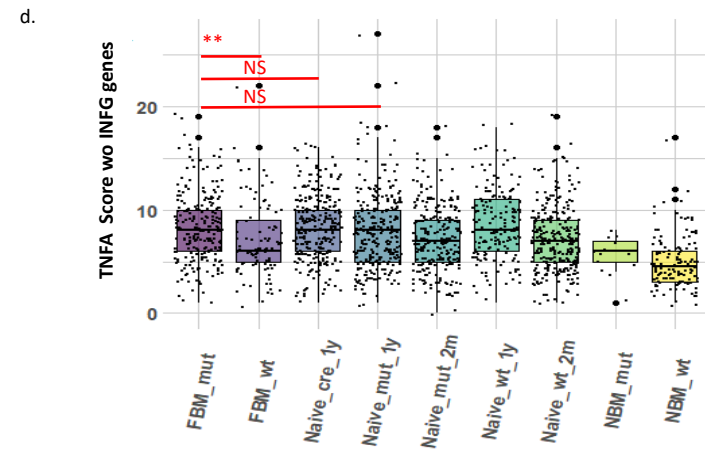

**Supplementary Fig. 12: Inflammatory signaling scores in the scRNA-seq data.** Ranked GSEA analysis on differentially expressed genes between *DNMT3A*<sup>mut</sup> cells exposed to FBM cluster and other clusters exposed significant enrichment of inflammatory pathways. An expression score for each single cell was calculated based on the expression of each of the genes in the gene set was calculated. **a.** Interferon alpha (IFN $\gamma$ ) gene set score. FBM\_mut vs. FBM\_wt p= 0.000114, FBM\_wt vs. Naive\_cre\_1y p= 1.70E-15. **b.** INFa gene set without genes shared by the interferon gamma (IFN $\gamma$ ) gene set. FBM\_mut vs. FBM\_wt p= 1.02E-05. **c.** IFN $\gamma$  gene set. FBM\_mut vs. FBM\_wt p= 0.001303, FBM\_wt vs. Naive\_cre\_1y p= 2.89E-09. **d.** Tumor necrosis factor alpha (TNFa) gene set without genes shared with the IFN $\gamma$  gene set. FBM\_mut vs. FBM\_wt p= 0.002381. All comparisons were performed using a two-tailed, non-paired, nonparametric Wilcoxon rank sum test with 95% confidence interval with FDR multiple hypothesis. \* p<0.05, \*\*p<0.005, \*\*\*p<0.0005, \*\*\*\*p<0.00005. Conditions: normal bone marrow (NBM); wild type (wt); fatty bone marrow (FBM); naïve cells- are cells extracted directly from BM of respective mice without transplantation. cre is the cre control.

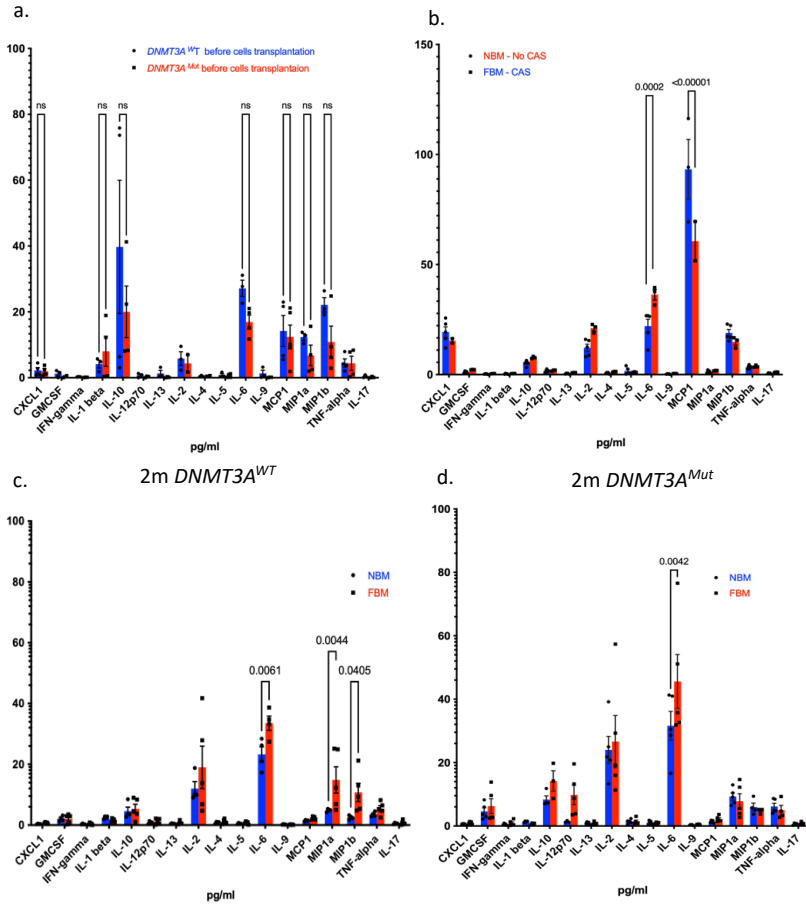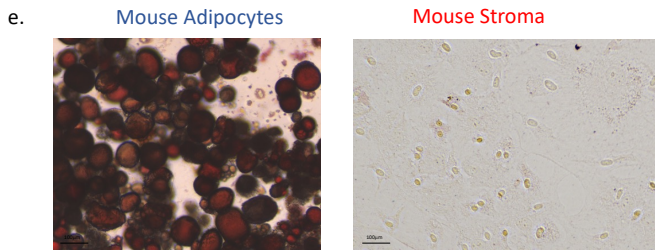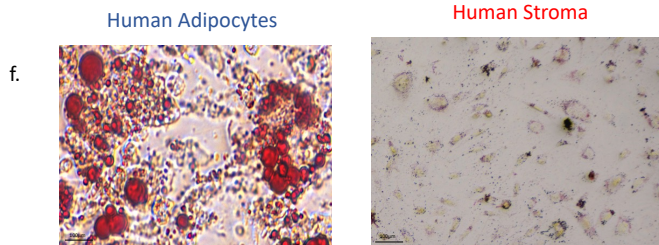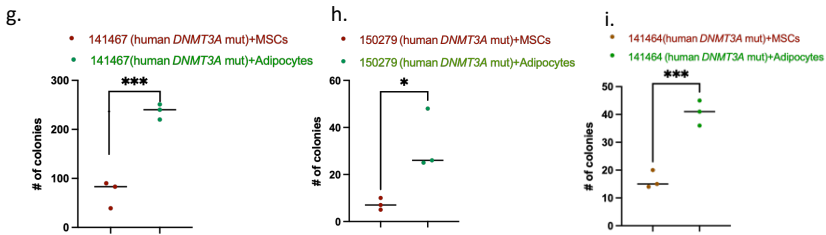

**Supplementary Fig. 13: Cytokine analysis of donor *DNMT3A<sup>Mut</sup>* or *DNMT3A<sup>WT</sup>* BM fluid.** **a.** Multiplex cytokines assay of 17 common cytokines analyzed by FACs in middle-aged donor *DNMT3A<sup>Mut</sup>* or *DNMT3A<sup>WT</sup>* BM fluid. One-year-old donor *DNMT3A<sup>Mut</sup>* or *DNMT3A<sup>WT</sup>* mice were sacrificed and BM cytokines from tibia/femur were analyzed. Data was analyzed by two-way ANOVA test – Sidaks multiple comparison test. Data are presented as mean values +/- SEM. The figure displays the p value. *DNMT3A<sup>WT</sup>* before transplantation n= 4,3,3,3,4,3,3,3,3,3,3,3,4,3,3,4,3. *DNMT3A<sup>Mut</sup>* before transplantation n= 4,3,3,4,4,3,3,3,4,4,3,5,4,4,4,3. **b.** FACS based multiplex method of NBM and FBM following castration of NSG mice. Data was analyzed by two-way ANOVA test – Sidaks multiple comparison test. Data are presented as mean values +/- SEM. The figure displays the p value. NBM n=5 for all except for MCP1 n=3. FBM n=3 for all, except for CXCL1 and MCP1 n=2. **c-d.** FACS based multiplex method of NBM and FBM of NSG mice transplanted with 2-months-old *DNMT3A<sup>Mut</sup>* or *DNMT3A<sup>WT</sup>* BM derived cells. Data was analyzed by two-way ANOVA test – Sidaks multiple comparison test. The figure displays the p value. c. NBM n=4 for all, FBM n=5 except for IL-6 n=4. d. NBM n=5,5,5,4,4,3,5,5,5,5,5,5,4,5,4. FBM n= 5,5,5,4,3,5,4,5,5,4,5,5,4,4,4. **e-f** mouse/human MSCs and adipocytes were cultured *in vitro* for ten days. Adipocytes were quantified using oil red staining. Data presented here is representative of three different experiments. scale bar: 100µM. **g-i** Human AML CD34+ cells with a *DNMT3A<sup>Mut</sup>* (sample #141467, sample #150279, sample #141464) were co cultured with adipocytes/MSCs. After ten days Colony Forming Unit (CFU) assay (n=3 for each sample) were performed, in which cells were cultured in methylcellulose with adipocytes or MSCs-derived media. Data in this figure presented as box and whiskers min to max. All comparisons were performed using a two-tailed, non-paired, Mann-Whitney test compare ranks. \* p<0.05, \*\*\*p<0.0005. g. 141467 (human *DNMT3A<sup>Mut</sup>*)+MSCs vs. 141467(human *DNMT3A<sup>Mut</sup>*)+Adipocytes p=0.0004.h. 150279 (human *DNMT3A<sup>Mut</sup>*)+MSCs vs. 150279 (human *DNMT3A<sup>Mut</sup>*)+Adipocytes p=0.0142.i. 141464(human *DNMT3A<sup>Mut</sup>*)+MSCs vs. 141464 (human *DNMT3A<sup>Mut</sup>*)+Adipocytes p=0.0008. Source data are provided as a Source Data file.

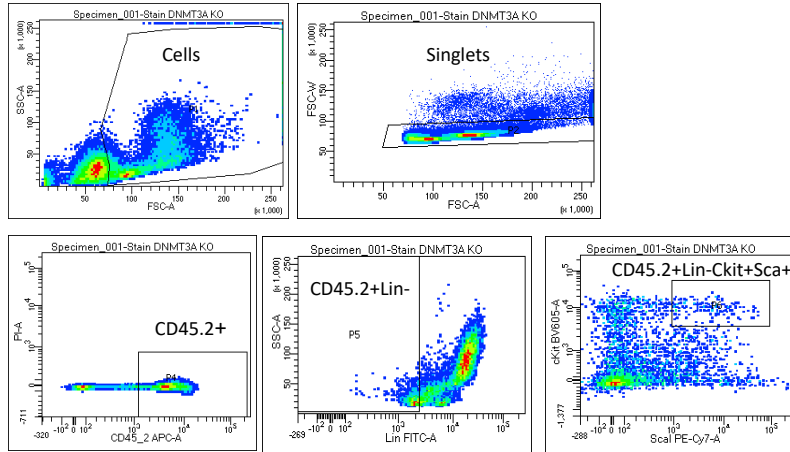

B.

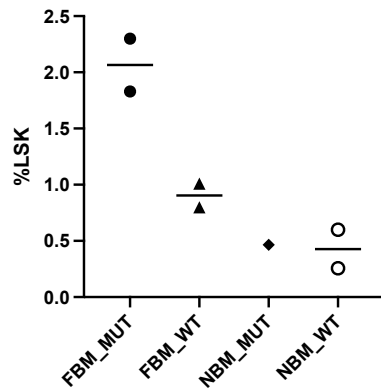

**Supplementary Fig. 14: a.** Steps of FACs analysis for LSK sorting. Cells were gated by using forward scatter height (FSC-H) vs. Forward scatter area (FSC-A) and FSC-w vs. FSC-A to exclude doublets. To further analyze LSK, cells were gated on CD45.2 cell population from which Lin negative cells were gated. Then cKit and Sca1 expression was analyzed on Lin<sup>-</sup> cells. **b.** Biological replicates of LSK (Data are presented as median) under NBM and FBM. FBM\_MUT n=2, FBM\_WT n=2, NBM\_MUT n=1, NBM\_WT n=2. Source data are provided as a Source Data file.

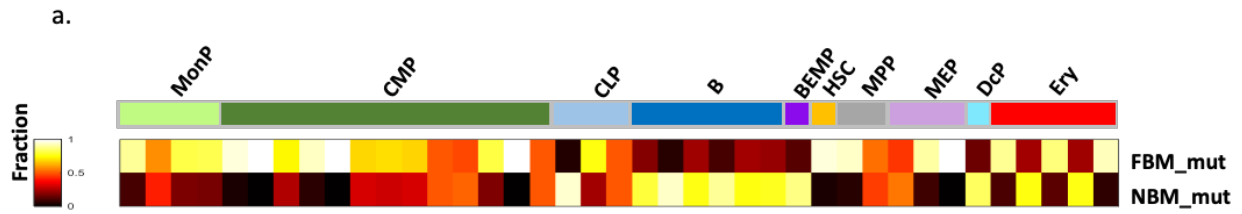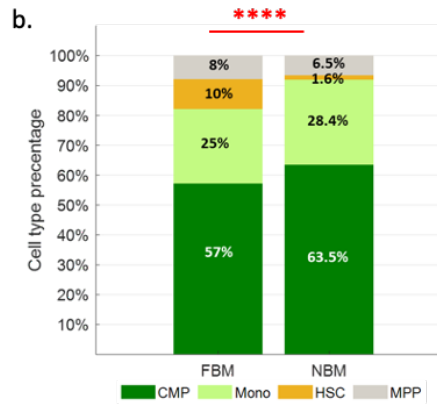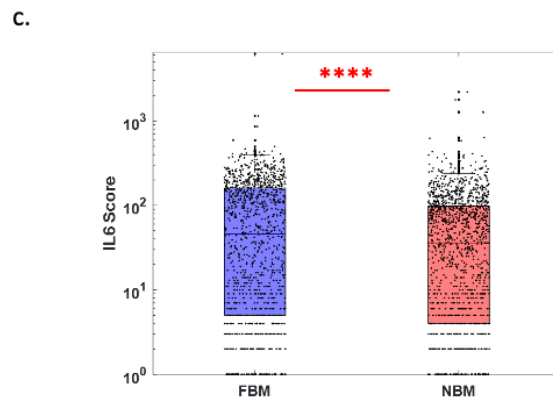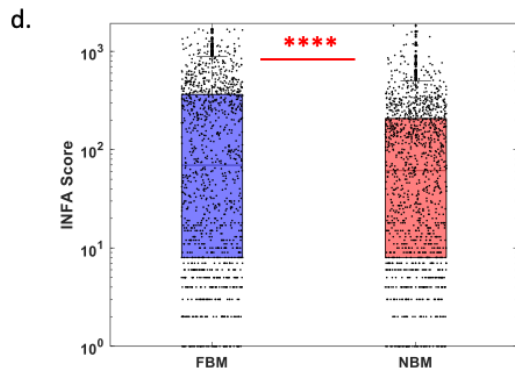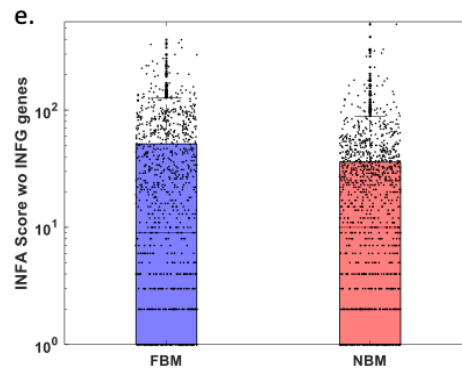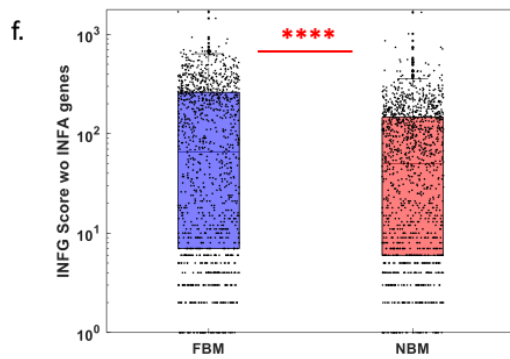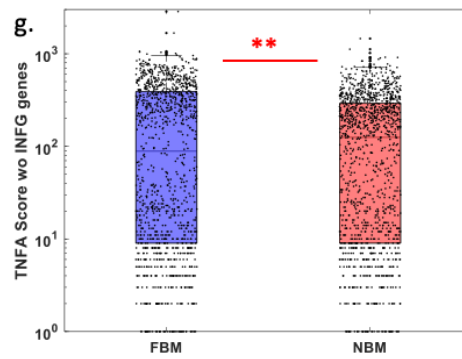



**Supplementary Fig. 15: validation of the scRNA-seq results by 10X V3 3' analysis.**

Bone marrow (BM) cells derived from one year old *DNMT3A<sup>mut</sup>* were injected to mice with fatty bone marrow (FBM) and normal bone marrow (NBM). Three days after injection lin-Sca1+KIT+ (LSK) cells were isolated from mice BM and underwent single cell RNA-Seq analysis. **a.** MetaCell algorithm was used to assign different single cells to Metacells with unique gene programs and cell types<sup>1</sup>. Gold, hematopoietic stem cells (HSCs); darkgreen, common myeloid progenitors (CMP); lightblue, common lymphoid progenitors, (CLP); cyan, dendritic progenitors (DcP); grey, multipotent progenitors (MPP); darkolivegreen, monocyte progenitors (MonoP); plum megakaryocytic erythroid progenitor (MEP); purple, basophil, eosinophil, mast progenitors (BEMPs); red, erythroid progenitors (Ery); steelblue B cells (B) and . **b.** While cell exposed to FBM demonstrate a marked reduction in HSCs after transplantation *DNMT3A<sup>mut</sup>* cells exposed to FBM have significantly higher HSCs frequency chi-square \*\*\*\*p<0.0001. **c.** Ranked GSEA analysis on differentially expressed genes between *DNMT3A<sup>mut</sup>* cells exposed to FBM cluster and other clusters exposed significant enrichment of inflammatory pathways one of them was the IL-6 JAK STAT3 response gene set. An expression score for each single cell was calculated based on the expression of each of the genes in the IL-6 gene set. All comparisons were performed using a two-tailed, non-paired, nonparametric Wilcoxon rank sum test with 95% confidence interval with FDR multiple hypothesis. \*\*p<0.005, \*\*\*\*\*p<0.00005. NBM vs. FBM P < 10<sup>-8</sup>. **d.** Interferon alpha (IFN $\alpha$ ) gene set score. NBM vs. FBM P < 10<sup>-7</sup> **e.** IFN $\alpha$  gene set without genes shared by the interferon gamma (IFN $\gamma$ ) gene set. NBM vs. FBM P =0.089 **f.** IFN $\gamma$  gene set. NBM vs. FBM P < 10<sup>-11</sup> **g.** Tumor necrosis factor alpha (TNF $\alpha$ ) gene set without genes shared with the IFN $\gamma$  gene set. NBM vs. FBM P = 0.002. Source data are provided as a Source Data file.



**Supplementary Table 3:** information on human samples

| Sample ID | Blasts' Immunophenotype                                                                                                                                                                                                                                                                                 | Molecular                                                                   |
|-----------|---------------------------------------------------------------------------------------------------------------------------------------------------------------------------------------------------------------------------------------------------------------------------------------------------------|-----------------------------------------------------------------------------|
| 160005    | from Rambam: 24% blasts at BM all: CD117+/CD13+/CD38+/CD11b-/CD16/CD15-/CD64-/CD33+/CD10-/DR+/CD123-/CD34-/MPO+ Could fit AML M1/M2 . cyCD19=0%, cyCD3=0%, CD64=0%, CD123=0%                                                                                                                            | <i>DNMT3A</i> R882, NPM1c                                                   |
| 141464    |                                                                                                                                                                                                                                                                                                         | <i>DNMT3A</i> R882                                                          |
| 141164    |                                                                                                                                                                                                                                                                                                         | <i>DNMT3A</i> R882, 3 different subclones<br>TET2 M1333K, ASXL1, JAK2 V617F |
| 141519    |                                                                                                                                                                                                                                                                                                         | WT                                                                          |
| 141467    |                                                                                                                                                                                                                                                                                                         | <i>DNMT3A</i> R882                                                          |
| 150279    | Positive for CD117 (dim equivocal), CD11b (predominantly negative, subset dim), CD33, CD38 (dim), CD71 (equivocal), CD123, CD11c, CD64 (very dim), with myeloperoxidase. Negative for CD13, CD14, CD15, CD16, CD36, CD56, CD65, HLA-DR, CD235a, CD19, CD10, cCD22, cCD79a, cCD3, CD2, CD4, CD7, or nTdt | FLT3-ITD+, FLT3-TKD-, NPM1+                                                 |

**Supplementary Table 4:** Antibodies and viability staining used for flow cytometry

| Antibody.                      | Manufacturer                      | Clone/Catalogue num. | Titer |
|--------------------------------|-----------------------------------|----------------------|-------|
| Anti mouse CD45.2-APC          | BioLegend, San Diego, CA, USA     | 104/109814           | 1:200 |
| Anti mouse CD45.1-PE           | BioLegend, San Diego, CA, USA     | A20/110708           | 1:200 |
| Rat anti mouse CD4 -FITC       | BioLegend, San Diego, CA, USA     | GK1.5/100408         | 1:200 |
| Rat anti mouse B220-FITC       | BioLegend, San Diego, CA, USA     | RA3-6B2/103208       | 1:200 |
| Rat anti mouse Gr1-FITC        | BioLegend, San Diego, CA, USA     | RB6-8C5/108406       | 1:200 |
| Rat anti mouse CD11b-FITC      | BioLegend, San Diego, CA, USA     | M1/70/101206         | 1:200 |
| Rat anti mouse CD8a-FITC       | BioLegend, San Diego, CA, USA     | 53-6.7 EF450/100706  | 1:200 |
| Rat anti mouse Ter119-FITC     | BioLegend, San Diego, CA, USA     | TER-119/116206       | 1:200 |
| Rat anti mouse c-kit- BV605    | BioLegend, San Diego, CA, USA     | 2B8/105847           | 1:500 |
| Rat anti mouse Sca-1-PE-Vio770 | Miltenyi Biotec                   | D7/130-102-832       | 1:500 |
| Mouse anti human CD45-BV510    | BioLegend, San Diego, CA, USA     | HI30/304036          | 1:200 |
| Mouse anti human CD33-APC      | BD Biosciences, San Jose, CA, USA | WM53/561817          | 1:100 |
| Mouse anti human CD34-APC Cy7  | BioLegend, San Diego, CA, USA     | 581/343514           | 1:100 |
| Mouse anti human CD15-BV421    | BioLegend, San Diego, CA, USA     | W6D3/323040          | 1:100 |
| Mouse anti human CD38-PE Cy7   | BioLegend, San Diego, CA, USA     | HIT2/980312          | 1:100 |
| Mouse anti human CD3-FITC      | BD Biosciences, San Jose, CA, USA | UCHT1/561806         | 1:100 |
| Mouse anti human CD19-PE       | BD Biosciences, San Jose, CA, USA | HIB19/555413         | 1:200 |

## References

1. Baran, Y. *et al.* MetaCell: analysis of single-cell RNA-seq data using K-nn graph partitions. *Genome Biol* **20**, (2019).
2. Ben-Kiki, O., Bercovich, A., Lifshitz, A. & Tanay, A. Metacell-2: a divide-and-conquer metacell algorithm for scalable scRNA-seq analysis. *Genome Biol* **23**, 100 (2022).
3. Baccin, C. *et al.* Combined single-cell and spatial transcriptomics reveal the molecular, cellular and spatial bone marrow niche organization. *Nat Cell Biol* **22**, 38–48 (2020).
