# Supplementary material for: Inflammatory signals from fatty bone marrow support DNMT3A driven clonal hematopoiesis
Source: PubMed Central journal article supplement (PMC10097668; doi:10.1038/s41467-023-36906-1), 2023-04-12
Supplement: 41467_2023_36906_MOESM4_ESM.pdf [file 41467_2023_36906_MOESM4_ESM.pdf]

## **Description of Additional Supplementary Files**

**Supplementary Data 1:** Expression between the different clusters in the UMAP

**Supplementary Data 2:** Data for Fig 4

**Supplementary Data 3:** Single RNA scores

**Supplementary Data 4:** Single RNA scores
